# Supplementary material for: Hepatoprotective Effects of Four Brazilian Savanna Species on Acetaminophen-Induced Hepatotoxicity in HepG2 Cells
Source: MDPI journal article supplement (doi:10.3390/plants12193393), 2023-09-26
Supplement: s1 [file s1]

## Supplementary material

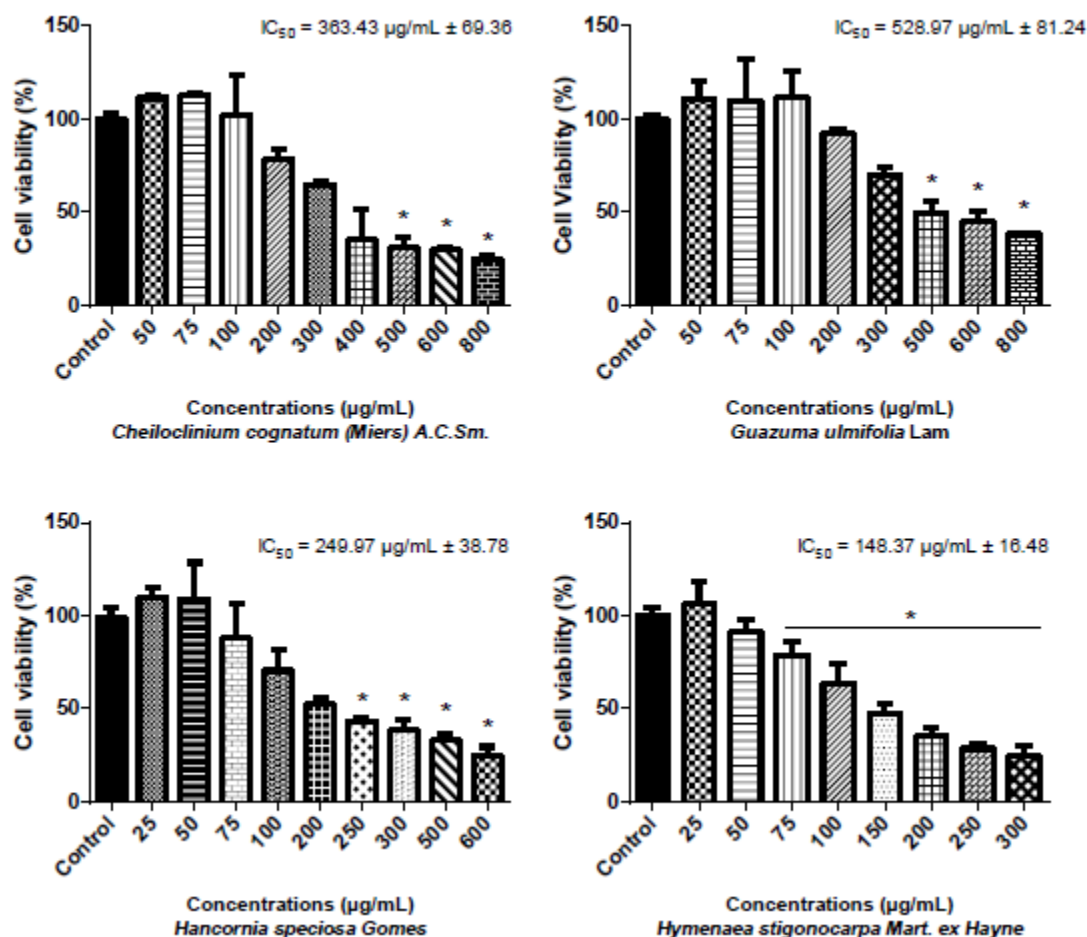

**Figure S1.** HepG2 cell viability after 24 hours of treatment with the aqueous extract of *Cheiloclinium cognatum* (Miers) A.C.Sm, *Guazuma ulmifolia* Lam., *Hancornia speciosa* Gomes and *Hymenaea stigonocarpa* leaves. Cell viability values (%) are expressed as a median and interquartile range (n=3). The viability results of the different extract concentrations were compared with the control by Kruskal-Wallis with Dunn's post-test (\* statistical difference from the control,  $p \leq 0.05$ ).

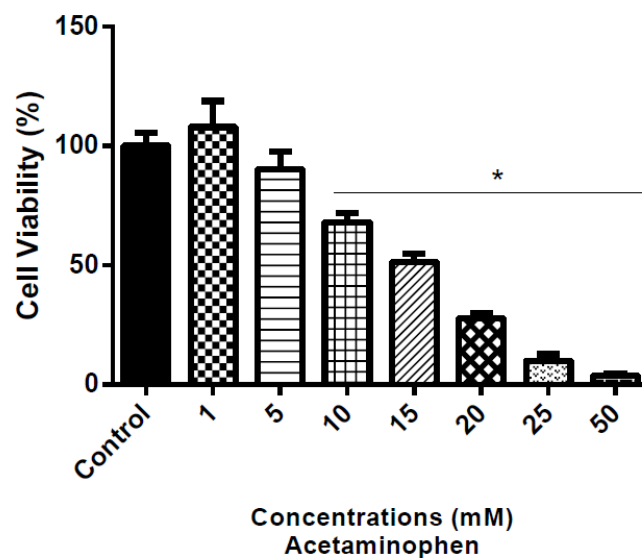

**Figure S2.** Cellular viability of HepG2 after 24 hours of treatment with acetaminophen. Cell viability values (%) are expressed as mean and standard deviation (n=3). The viability results of different paracetamol concentrations were compared with the control by analysis of variance (ANOVA) with Dunnet post-test. (\* $p \leq 0.05$ ).

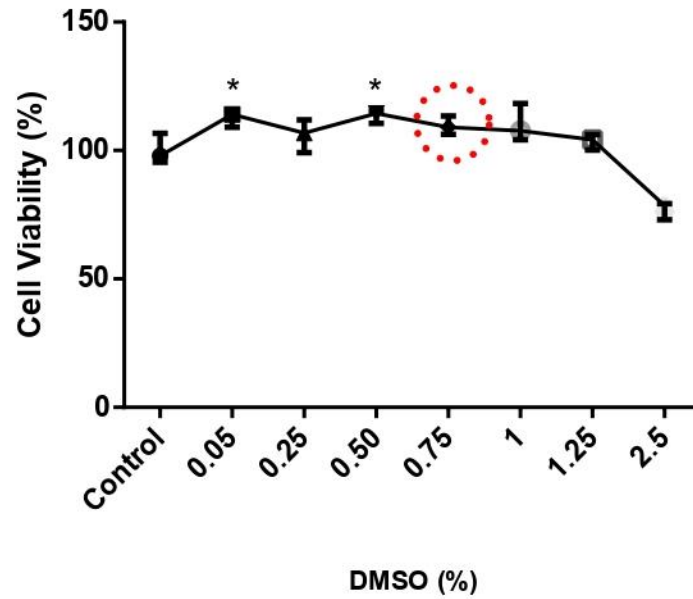

**Figure S3.** HepG2 cell viability after 24 hours of treatment with DMSO concentrations used to prepare the APAP concentrations. The 0.05% concentration corresponds to the lowest concentration on the APAP curve (1 mmol/L) and the 2.5% concentration corresponds to the highest concentration on the APAP curve (50 mmol/L). The concentration in the graph corresponds to the percentage of DMSO used to prepare the 15 mmol/L concentration used in the hepatoprotection assay. Cell viability values (%) are expressed as the median and interquartile range (n=3). The viability results of different extract concentrations were compared with control by Kruskal-Wallis with Dunn's post-test (\*,  $p \leq 0,05$ ).

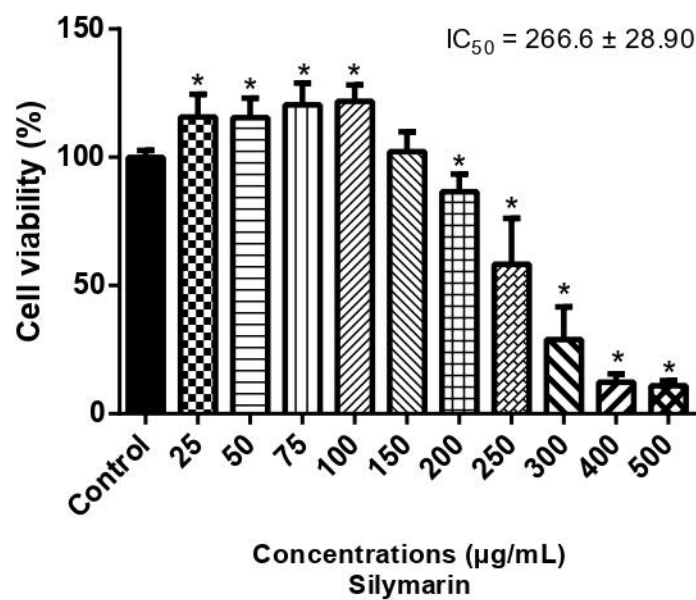

**Figure S4.** HepG2 cell viability after 24 hours of treatment with the concentrations of silymarin. Cell viability values (%) are expressed as mean and standard deviation (n=3). Viability results of different concentrations of the compound were compared with the control by analysis of variance (ANOVA) with Dunnet's post-test. (\*,  $p \leq 0,05$ ).
